# Supplementary material
Source: Royal Society of Chemistry journal article supplement (doi:10.1039/d5tc04106f)
Supplement: d5tc04106f1.pdf [file d5tc04106f1.pdf]

## Supporting Information

### Advanced Co-Self-Assembled Monolayers for Stress Relief and Performance Optimization in Methylammonium-Free Perovskite Solar Cells

Che-Chia Hsu<sup>1</sup> and Sheng-Hsiung Yang<sup>\*,2</sup>

<sup>1</sup>Institute of Photonic System and <sup>2</sup>Institute of Lighting and Energy Photonics, College of Photonics, National Yang Ming Chiao Tung University, No. 301, Section 2, Gaofa 3rd Road, Guiren District, Tainan 711010, Taiwan, ROC

\*Correspondence: yangsh@nycu.edu.tw

Table S1. Atomic percentage of P, Sn, and O atoms measured by EDS of the pristine MeO-2PACz, Co-SAM (4-PA), and Co-SAM (4-PAA) on FTO substrates.

|                | P atom (%) | Sn atom (%) | O atom (%) |
|----------------|------------|-------------|------------|
| MeO-2PACz      | 1.38       | 31.82       | 66.80      |
| Co-SAM (4-PA)  | 1.52       | 31.47       | 67.01      |
| Co-SAM (4-PAA) | 1.58       | 32.08       | 66.34      |

Table S2. TR-PL fitting parameters of perovskite films deposited on MeO-2PACz, Co-SAM (4-PA), and Co-SAM (4-PAA).

| Sample         | A <sub>1</sub> (%) | $\tau_1$ (ns) | A <sub>2</sub> (%) | $\tau_2$ (ns) | $\tau_{avg}$ (ns) |
|----------------|--------------------|---------------|--------------------|---------------|-------------------|
| MeO-2PACz      | 49                 | 10.1          | 39.7               | 702.5         | 690.4             |
| Co-SAM (4-PA)  | 52.7               | 7.97          | 31.3               | 342.2         | 329.6             |
| Co-SAM (4-PAA) | 66.8               | 5.68          | 25.6               | 287.3         | 273.5             |

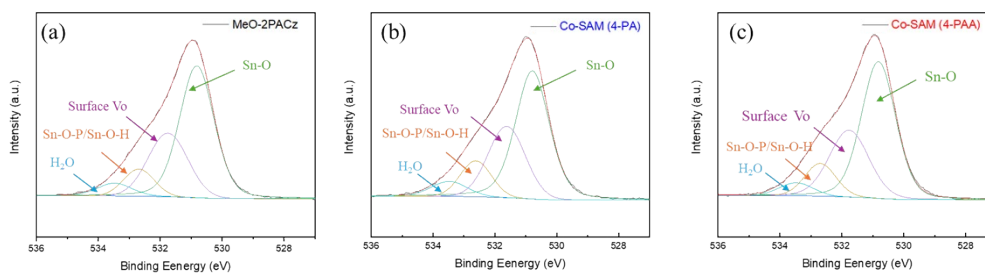

Fig. S1. O 1s XPS spectra of (a) MeO-2PACz, (b) Co-SAM (4-PA), and (c) Co-SAM (4-PAA) on FTO substrates.

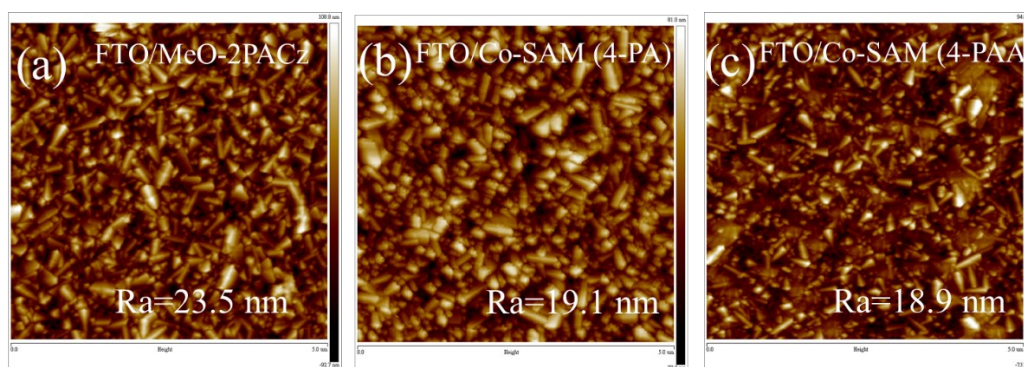

Fig. S2. Topographic AFM images with  $R_a$  values of MeO-2PACz, Co-SAM (4-PA), and Co-SAM (4-PAA) on FTO substrates.

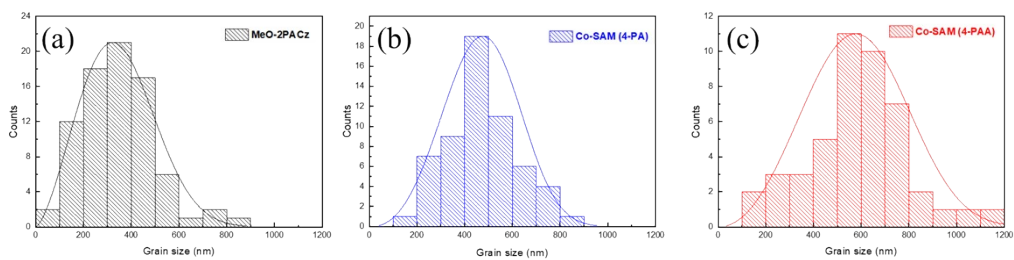

Fig. S3. Grain-size distributions of perovskite layers on (a) MeO-2PACz, (b) Co-SAM (4-PA), and (c) Co-SAM (4-PAA).

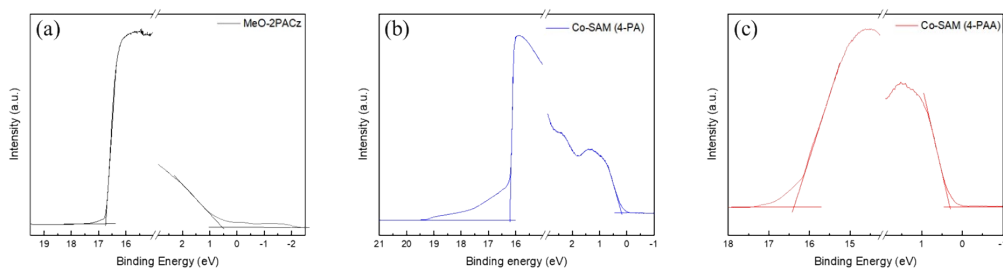

Fig. S4. UPS spectra of (a) MeO-2PACz, (b) Co-SAM (4-PA), and (c) Co-SAM (4-PAA)

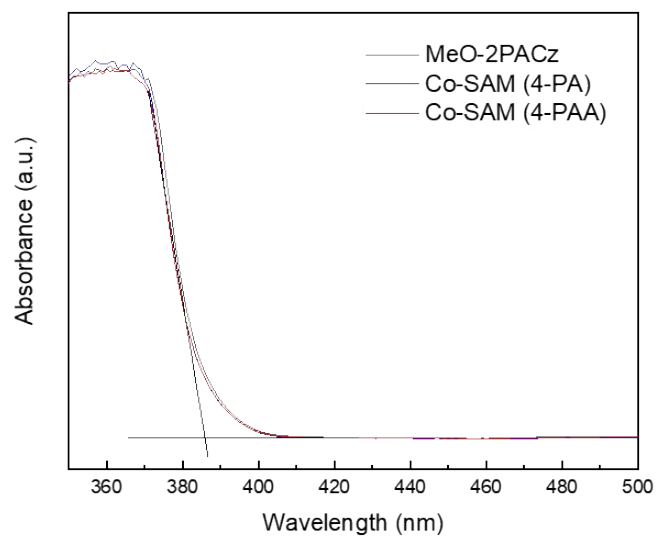

Fig. S5. UV-vis absorption spectra of MeO-2PACz, Co-SAM (4-PA), and Co-SAM (4-PAA)

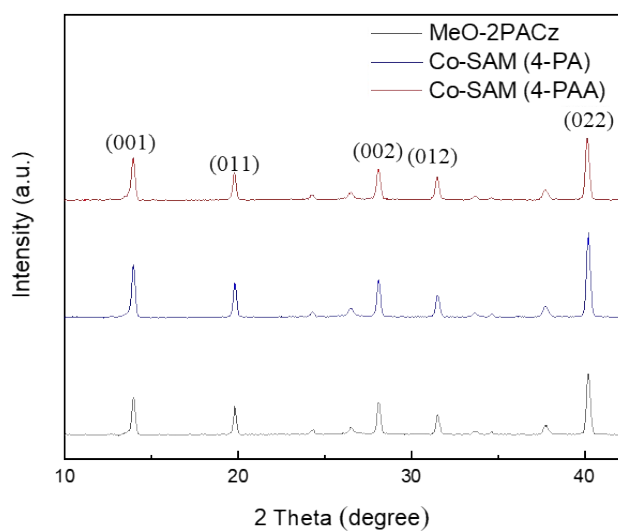

Fig. S6. XRD analysis of perovskite films deposited on various SAM-modified substrates.

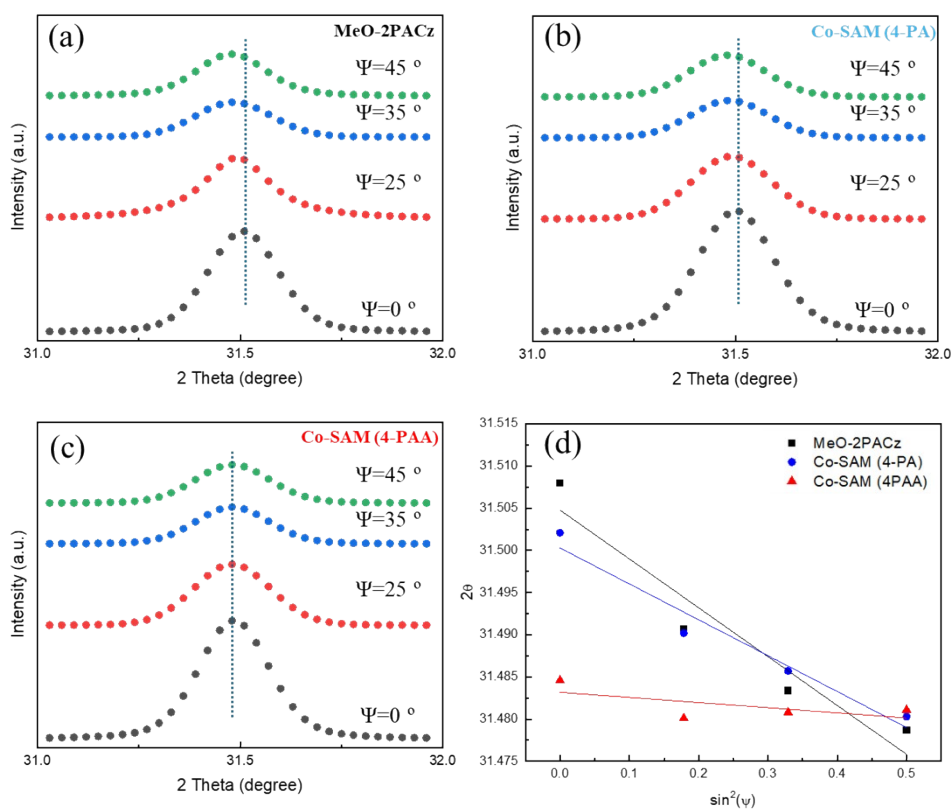

Fig. S7. GIXRD patterns of the perovskite films deposited on (a) MeO-2PACz, (b) Co-SAM (4-PA), and (c) Co-SAM (4-PAA), measured at different  $\psi$  angles from  $5^\circ$  to  $45^\circ$ ; (d)  $2\theta$  versus  $\sin^2(\psi)$  plots for the corresponding perovskite films on FTO/MeO-2PACz, FTO/Co-SAM (4-PA), and FTO/Co-SAM (4-PAA).

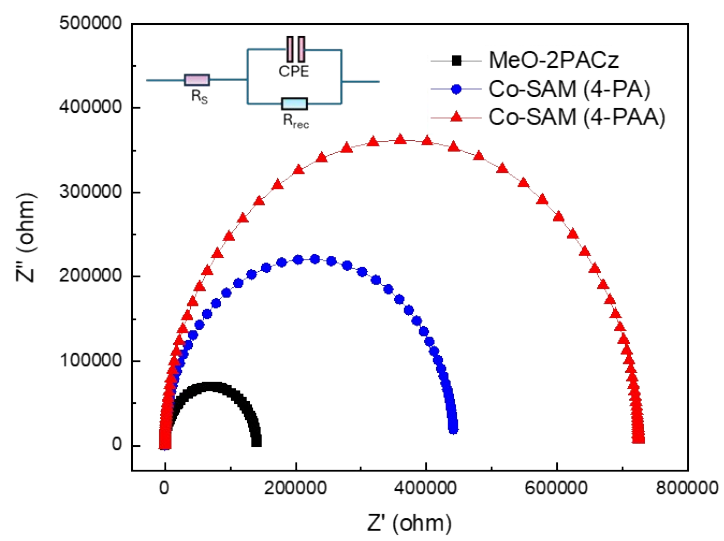

Fig. S8. Nyquist plots of PSCs without or with Co-SAM modification.
